# Supplementary material
Source: MDPI journal article supplement (https://www.mdpi.com/2410-3888/7/2/64)
Supplement: s1 [file s1]

Figure S1 Compared with the stage I, the biological process and pathways enriched in stage III and IV.

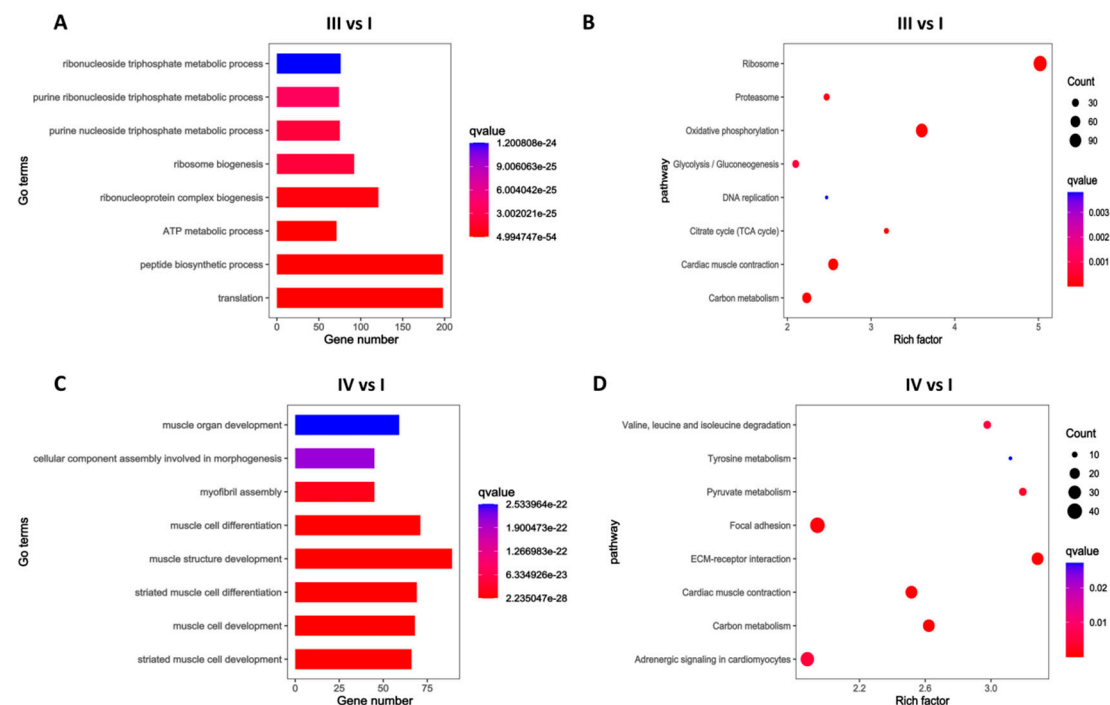

Table S1 WGCNA analysis of 54 highly connected genes in the turquoise module.

| Hub-genes        |          |                |                   |                |
|------------------|----------|----------------|-------------------|----------------|
| nusap1           | pank2    | ccdc102a       | znf710b           | brms11a        |
| cnot4a           | mynn     | si:dkey-42i9.4 | ormdl1            | pknox1.1       |
| pdc4a            | fbxo44   | lsp1           | zmym2             | nuak1b         |
| crkl             | tbx1     | mtus1b         | mpped2            | phf3           |
| meal             | Id1      | kIF2A          | prickle1b         | smad6a         |
| svila            | Phc2a    | kdm5ba         | cnot10            | tgif1          |
| cnot2            | btbd10a  | atf7ip         | cnp               | ptena          |
| arl3             | mctp2b   | fbxo25         | znf839            | efs            |
| apba3            | entpd5b  | il17rd         | igfbp3            | cabz01069339.1 |
| si:ch211-154o6.3 | Lrp6     | tl1n           | msx2b             | znf644a        |
| slcla3a          | kirrel3l | psd3l          | si:ch211-155e24.3 |                |

Table S2 Based on the results of WGCNA and transcriptome analysis, the FPKM values of 21 candidate genes related to zebrafish scale development were identified.

| Gene ID             | Gene<br>name | FPKM   |        |        |        |        |        |        |        |        |        |       |
|---------------------|--------------|--------|--------|--------|--------|--------|--------|--------|--------|--------|--------|-------|
|                     |              | I-1    | I-2    | II-1   | II-2   | II-3   | III-1  | III-2  | III-3  | IV-1   | IV-2   | IV-3  |
|                     |              |        |        |        |        |        |        |        |        |        |        |       |
| ENSDARG000000075598 | Scpp6        | 0      | 0      | 775.12 | 569.61 | 343.64 | 156.32 | 313.29 | 0.695  | 0.269  | 0      | 0     |
|                     |              |        |        | 2      | 9      | 7      | 4      | 6      |        |        |        | 3     |
| ENSDARG000000074132 | Scpp7        | 2.133  | 3.853  | 16515. | 14804. | 9732.3 | 7428.8 | 11736. | 44.813 | 24.776 | 10.022 | 10.07 |
|                     |              |        |        | 5      | 8      | 9      | 7      | 3      |        |        |        | 9     |
| ENSDARG000000078622 | Scpp5        | 0.674  | 0.374  | 20.193 | 13.524 | 11.400 | 6.203  | 12.204 | 0.325  | 0      | 0.220  | 3.270 |
|                     |              |        |        |        |        |        |        |        |        |        |        |       |
| ENSDARG000000093124 | Scpp8        | 0.750  | 0.250  | 11.230 | 13.445 | 8.611  | 4.673  | 5.950  | 1.841  | 1.241  | 1.664  | 0     |
|                     |              |        |        |        |        |        |        |        |        |        |        |       |
| ENSDARG000000038672 | tcf7         | 1.030  | 2.106  | 97.587 | 90.286 | 73.205 | 50.817 | 51.636 | 4.804  | 2.560  | 0.572  | 0     |
|                     |              |        |        |        |        |        |        |        |        |        |        |       |
| ENSDARG000000090394 | Timp4.1      | 0.050  | 0.028  | 25.065 | 24.350 | 4.162  | 2.738  | 6.381  | 2.628  | 1.590  | 0.662  | 0     |
|                     |              |        |        |        |        |        |        |        |        |        |        |       |
| ENSDARG000000011190 | fgfr1b       | 0.215  | 0.572  | 15.328 | 13.790 | 5.716  | 3.962  | 8.180  | 0      | 0.680  | 0.542  | 0     |
|                     |              |        |        |        |        |        |        |        |        |        |        |       |
| ENSDARG000000004782 | fgfr3        | 0.081  | 0.561  | 9.813  | 9.096  | 9.516  | 3.620  | 4.665  | 3.624  | 2.390  | 0.643  | 0     |
|                     |              |        |        |        |        |        |        |        |        |        |        |       |
| ENSDARG000000059233 | runx2b       | 0.102  | 0.256  | 11.680 | 10.782 | 8.066  | 4.332  | 6.631  | 18.782 | 14.466 | 8.497  | 0     |
|                     |              |        |        |        |        |        |        |        |        |        |        |       |
| ENSDARG000000040925 | wnt10b       | 0      | 0.295  | 10.189 | 9.654  | 5.703  | 6.663  | 6.667  | 0.686  | 0.200  | 0      | 0     |
|                     |              |        |        |        |        |        |        |        |        |        |        |       |
| ENSDARG000000075720 | il2rb        | 0.035  | 0.329  | 11.014 | 8.411  | 7.090  | 6.044  | 5.231  | 6.204  | 1.205  | 0.116  | 0     |
|                     |              |        |        |        |        |        |        |        |        |        |        |       |
| ENSDARG000000075172 | fbxo25       | 1.668  | 1.088  | 26.60  | 20.826 | 14.921 | 7.508  | 9.362  | 9.951  | 5.632  | 3.050  | 4.764 |
|                     |              |        |        |        |        |        |        |        |        |        |        |       |
| ENSDARG000000000000 | tgif1        | 20.506 | 12.958 | 52.347 | 44.733 | 49.663 | 25.093 | 25.136 | 15.304 | 18.625 | 18.760 | 8.810 |

[illegible]
